# Supplementary material for: Stratospheric ozone trends and attribution over 1984–2020 using ordinary and regularised multivariate regression models
Source: Copernicus journal article supplement (doi:10.5194/egusphere-2023-591), 2023-04-14
Supplement: Supplementary file [file egusphere-2023-591-AC1-supplement.pdf]

## 1 **Reply to the comments from the reviewer (Mark Weber):**

2  
3 We thank Dr Weber for his useful comments and suggestions which have helped to improve  
4 the manuscript. The reviewer's comments are given below in black text, followed by our  
5 responses in blue text.

6  
7 This paper reports on ozone trends derived from observations (SWOOSH dataset) and three  
8 versions of the TOMCAT chemistry-transport-model (CTM). One of the CTMs  
9 (ML-TOMCAT) has been adjusted to satellite observations, while the other two used  
10 meteorological data from different reanalyses, ERA5 and its predecessor ERA Interim (up to  
11 2019). Two types of regression models are used for ozone trend estimates before and after the  
12 peak of stratospheric halogens occurring in the middle 1990. The first is the  
13 ordinary-least-squares regression (OLS), the second is the ridge regression. The main idea  
14 behind the ridge regression is to introduce an additional constraint in the cost function that  
15 minimises the fit coefficients. Such a regression is generally recommended to avoid  
16 overfitting. In general the ridge regression reduces the (absolute) trends (and all other fit  
17 coefficients) and on the other hand reduces the variances (and correlation) between regression  
18 model and the underlying data. The trends after 1998 in the upper stratosphere are positive  
19 and significant in agreement with other studies (~2%/decade, e.g. Godin-Beekmann et al.,  
20 2022). The ridge regression roughly halves these trends. Overall the paper is well written.  
21 Some issues still need to be addressed before acceptance of the paper.

22  
23 Discussion points:

24 1. 30, 1. 34 and other places: Differences in ozone trends at 100 hPa from OLS and ridge are  
25 larger than 4%/decade (7%/decade in the tropics), but the trend uncertainties are on the order  
26 of 24%. This means that these differences are not significantly different from zero. More  
27 relevant is the difference in the upper stratosphere (~1%/decade vs ~2%/decade), both  
28 significant. This should be mentioned here.

29  
30 Reply: According to the reviewer's suggestion, we have updated our results with ARI  
31 correction applied to the OLS regression. As mentioned by the reviewer, the trend coefficients  
32 do not change much but the uncertainties increase to some extent with this correction.  
33 Detailed figures are updated and shown in the revised manuscript.

34  
35 We have modified the sentences in the abstract (Lines 29-38) based on the updated results:  
36 "For 1984-1997, we observe smaller negative trends in the SWOOSH stratospheric ozone  
37 profile using Ridge regression compared to OLS. Except for the tropical lower stratosphere,  
38 the largest differences arise in the mid-latitude lowermost stratosphere (>4% per decade  
39 difference at 100 hPa). Since 1998, and the onset of ozone recovery in the upper stratosphere,  
40 the positive trends estimated using the Ridge regression model (~1% per decade near 2 hPa)  
41 are smaller than those in OLS (~2% per decade). In the lower stratosphere, post-1998  
42 negative trends with large uncertainties are observed and Ridge-based trend estimates are  
43 somewhat smaller and less variable in magnitude compared to the OLS regression. Aside

44 from the tropical lower stratosphere, the largest difference is around 2% per decade at 100  
45 hPa (with ~3% per decade uncertainties for individual trends) in northern midlatitudes. For  
46 both time periods the SWOOSH data produces large negative trends in the tropical lower  
47 stratosphere with a correspondingly large difference between the two trend methods. In both  
48 cases the Ridge method produces a smaller trend."

49  
50 We also added the related information in the main text (Lines 290-295): "The largest  
51 difference between OLS and Ridge regression methods occurs in the tropical lowermost  
52 stratosphere with a difference of ~9% per decade at 100 hPa (but with larger  
53 uncertainties >10% per decade for both regression methods), followed by the NH  
54 mid-latitudes with >2% per decade difference at 100 hPa (~3% per decade uncertainties).  
55 Note that, despite the large differences between OLS and Ridge-based trends, they are still  
56 within the uncertainties of the individual trends."

57  
58 l. 37: It is not surprising that ML-TOMCAT agrees better with SWOOSH than the other  
59 models. Satellite corrections are derived from the same data that are also part of SWOOSH  
60 (e.g. MLS). This should be mentioned here and also in the main text.

61  
62 Reply: Yes. ML-TOMCAT agrees better with SWOOSH than the other models though it is  
63 adjusted with SWOOSH data only for the Microwave Limb Sounder (MLS) measurement  
64 period (UARS-MLS and AURA-MLS). We have added this information in the revised  
65 manuscript. For e.g., "Comparing the ML-TOMCAT-based trend estimates with the  
66 ERA5-forced model simulation, we find ML-TOMCAT shows significant improvements with  
67 much better consistency with the SWOOSH data set, despite the ML-TOMCAT training  
68 period overlapping with SWOOSH only for the Microwave Limb Sounder (MLS)  
69 measurement period." (Lines 44-46)

70  
71 l. 102: A detailed comparison between ERAI-TOMCAT and ERA5-TOMCAT has been  
72 reported in Li et al. 2022. In this paper the model data have been extended to 2020, however,  
73 ERAI ends in 2019 and trends are only reported up to 2018 for the ERAI-driven model. As  
74 the differences between both models are not discussed in detail here but well covered in Li et  
75 al. 2022, it could be safely omitted from this paper.

76  
77 Reply: OK. We thank the reviewer for this insightful suggestion. We have removed the  
78 ERAI-TOMCAT simulation and used only ERA5-TOMCAT to make the plots and main text  
79 clearer and easier to read. Thus, all the data sets now have the same time period (1984-2020).  
80 We also updated all the related text and figures in the revised manuscript as well as in the  
81 supplement. Modifications are marked in red in the "track-changed" version of the revised  
82 manuscript. (Note: The ERA5-TOMCAT simulation data used in the revised manuscript are  
83 updated with the same latitude bins and pressure levels as SWOOSH and ML-TOMCAT  
84 data)

86 l. 161: The MLR setup is very different from Li et al. 2022. For instance, now twelve  
87 (monthly) trend terms are used instead of one (annual) and more proxies are used (e.g. EP  
88 flux). Please motivate why you added more terms into the regression.

89

90 Reply: Yes, the MLR setup used here is different from Li et al. (2022). It is a modified  
91 version of that used in Dhomse et al. (2022). We use twelve (monthly) trend terms instead of  
92 one (annual) as it is better at capturing seasonal patterns, and has better sensitivity to  
93 short-term fluctuations and improved flexibility that means better goodness of fit ( $R^2$ ). We  
94 also use more proxies (e.g. EP flux) to account for the dynamical variability of stratospheric  
95 ozone and to separate the influence of individual processes (e.g. Dhomse et al., 2022; Weber  
96 et al., 2022). Additionally, although the inclusion of the dynamical proxies will generally  
97 improve the MLR fit, the various atmospheric-dynamics-related proxies are partially  
98 correlated which makes the attribution with a MLR a little tricky. So here we focus on using  
99 Ridge regression to avoid the over-fitting issue when more proxies are added into the  
100 regression. We also added a few sentences in the revised manuscript to motivate why we  
101 added more terms into the regression (See Lines 179-182).

102

103 l. 165: Here you mention the use of the EP flux proxy, but its contribution to ozone changes is  
104 not discussed in the paper. Its contribution needs to be added in Fig. 10.

105

106 Reply: We have added the contribution from the EP flux proxy (the vertical component Fz at  
107 50 hPa) in Figure 10 and the supplementary Figure S7. We also added discussion about its  
108 contribution to ozone changes in the revised manuscript (Lines 463-470): "Changes in the  
109 vertical component (Fz) of the stratospheric EP flux represents the ozone transport due to  
110 variations in planetary wave driving from the troposphere into the stratosphere (Fusco and  
111 Salby, 1999; Weber et al., 2003; Dhomse et al., 2006). In the tropics, the strengthened upward  
112 transport is linked to an upward shift of the maximum ozone mixing ratio in the middle  
113 stratosphere, as a result there are two cells of opposite ozone pattern near 10 hPa. A similar  
114 pattern appears at mid-latitudes due to enhanced transport by the stratospheric residual  
115 circulation. The out-of-phase between the tropics and mid-latitudes reflects the overturning  
116 Brewer-Dobson circulation (Randel et al., 2002). In the lower stratosphere, the hemispherical  
117 asymmetric ozone pattern could potentially result from the combination of changes in  
118 chemical and dynamical processes (Banerjee et al., 2016; Abalos et al., 2017)."

119

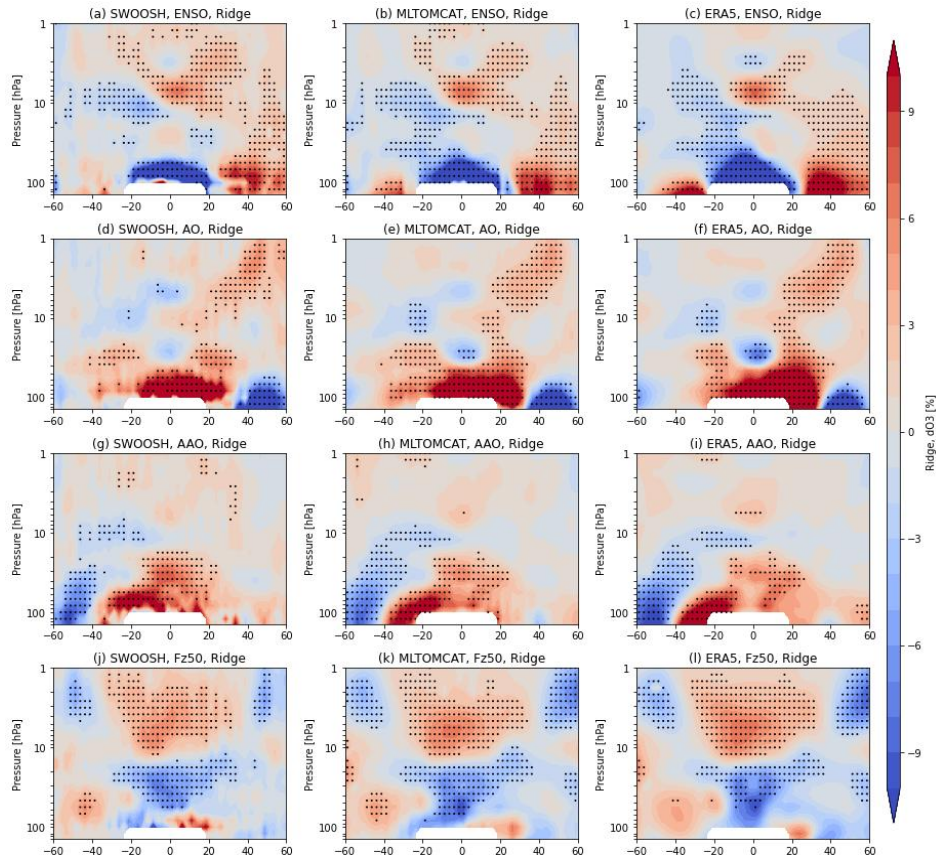

120

121 **Figure 10:** Latitude-pressure cross sections of the natural ozone variations (%) associated with (a-c) ENSO, (d-f) AO, (g-i) AAO and (j-l) EP flux (Fz50) derived from SWOOSH, ML-TOMCAT and simulation ERA5 based on the Ridge regression method. The stippling indicates regions that are significant at the 95 % level.

122

123

124

125

126

127

128

129

130

131

132

133

134

135

136

137

138

139

140

141

142

l. 170: Only years 1991 and 1992 have been removed to avoid the use of an aerosol proxy, but Pinatubo eruption affected more years, e.g. end of 1990, 1993 and 1994. Please comment.

Reply: We agree with the reviewer, hence we have revised the regression models. To exclude the effect from Mt. Pinatubo eruption (1991), we removed the years of data from 1991 to 1994 in the updated regression models. The updated results with two more years (1993-1994) removed show very consistent results with previous results (1991-1992), except for some minor differences (e.g. ozone trends in the tropical lower stratosphere increase slightly during 1984-1997).

l. 175: Detrending means that the long-term trends in the proxies are moved to the linear trend terms. In Weber et al. 2022 we argued that the long-term dynamic trends are largely removed by the trends in the proxies, so that linear trends are then approximating the ODS related trends. In your case, the linear trends are combining dynamic and chemical trends. That should be mentioned here.

143 Reply: OK. We thank the reviewer for this reminder. We have added a sentence in the revised  
144 manuscript to make it clear that the linear trends in our case are the combination of dynamic  
145 and chemical trends (See Lines 187-188): "By de-trending, the long-term trends in various  
146 proxies are moved to the linear trend terms, that is, the independent linear trends in the MLR  
147 combine both the dynamic and the ODS-related chemical trends (Weber et al., 2022)."  
148

149 l. 178: Collinearity means that both vectors (or time series) are 100% correlated, which is not  
150 the case here. What you mean is that many proxies are highly correlated with each other. It is  
151 suggested to avoid the term collinear throughout the text.  
152

153 Reply: We thank the reviewer for the correction and suggestion. We have checked throughout  
154 the text and revised the term "multi-collinearity" to "over-fitting/highly correlated".  
155

156 l. 187: "OLS will be not robust and will result in inaccurate model." I think this is not correct.  
157 The OLS regression model will yield the same (overall) results after orthogonalising all  
158 proxies, so OLS remains robust (as also your results show). The ridge regression is another  
159 representation with different constraints, but not necessarily better than OLS. Ridge and OLS  
160 derived trends in nearly all cases agree to within the uncertainties of the trends (Figs 2 and 3).  
161 Suggest to omit this sentence.  
162

163 Reply: We apologise for this incorrect statement. We have omitted this sentence in the revised  
164 manuscript. We totally agree that "The ridge regression is another representation with  
165 different constraints, but not necessarily better than OLS".  
166

167 l. 202: What is the training dataset? Suggest omit "to the training data"  
168

169 Reply: We have omitted "to the training data".  
170

171 l. 203: Omit "when the MSE reaches the minimum"; reference to Pedregosa et al. suffices.  
172

173 Reply: We have omitted "when the MSE reaches the minimum".  
174

175 l. 207: "cross-validated MSE" needs to be explained in the text. One may also want to state  
176 the drawback of ridge regression: the fit residuals (correlation between model and regression)  
177 will be larger (smaller) than that from OLS.  
178

179 Reply: We have added the explanation of the "cross-validated MSE" in the revised  
180 manuscript (Lines 215-216): "The cross-validated MSE (the average of all of the test MSEs  
181 calculated from different training and testing sets) and coefficients for the Ridge regression  
182 model are also shown as the  $\alpha$  value grows from 0.01 to 100."  
183

184 Cross-validation is a way of studying how a specific sampled data set influences the mean  
185 squared error/model fit, and provides a less sample-specific estimate of the MSE. In our case,  
186 the fit residuals (correlation between model and regression) from Ridge regression are to

187 some extent larger (smaller) than that from OLS. The reason is probably that the original OLS  
188 regression is somewhat over-fitting and this leads to smaller errors.

189

190 l. 239: different period is used for ERAI. Does that have an effect on the trends. Shouldn't  
191 ERAI be compared with other data using the same period. see also comment earlier.

192

193 Reply: As replied earlier, we have removed ERAI-TOMCAT simulation from the manuscript  
194 and used only ERA5-TOMCAT simulation in the revised version.

195

196 l. 241: readability of numbers in the tables will be improved if only one digit is only shown,  
197 e.g. -3.4(2.5) instead of -3-39(2.47).

198

199 Reply: Thank you. To improve the readability, we have modified the numbers in the tables as  
200 well as in the main text with only one digit.

201

202 l. 249: Within the uncertainties of both regressions the trend results (ridge and OLS) are not  
203 different from each other! I think this should be mentioned in the main text as well (see earlier  
204 comment). Is the annual mean the average of the twelve monthly means? Is the uncertainty of  
205 the annual trend the standard deviation from taking the mean from the monthly values or are  
206 the uncertainties from the individual months are error-propagated into the annual mean?  
207 Please explain.

208

209 Reply: As replied earlier, we have modified the sentences in the abstract as well as in the  
210 main text. Please find them in the revised manuscript.

211 Yes, the annual mean is the average of the twelve monthly means, and the uncertainty of the  
212 annual trend is the standard deviation from taking the mean from the monthly values. We  
213 have added the explanation in the main text (Lines 251-253).

214

215 l. 265: mention here that the large differences in trends are within the uncertainties of the  
216 individual trends (see above).

217

218 Reply: We have modified the sentence and added the information as follows: "The largest  
219 difference between OLS and Ridge regression methods occurs in the tropical lowermost  
220 stratosphere with a difference of ~9% per decade at 100 hPa (but with larger  
221 uncertainties >10% per decade for both regression methods), followed by the NH  
222 mid-latitudes with >2% per decade difference at 100 hPa (~3% per decade uncertainties).  
223 Note that, despite the large differences between OLS and Ridge-based trends, they are still  
224 within the uncertainties of the individual trends." (Lines 290-295).

225

226 l. 335: In the lower stratosphere ridge and OLS are not reliable and fail to capture the large  
227 variability. In addition, the data quality of satellites is lower in this region. So the "linear  
228 relationship" is not the issue here

229

230 Reply: We apologise for the incorrect statement. We have modified this sentence in the  
231 revised manuscript (Lines 373-376) as follows: "The considerable differences suggest that  
232 there is a large degree of uncertainty in the estimates of seasonal ozone trends, particularly in  
233 the lower stratosphere, where dynamical processes dominate, in addition there is larger  
234 uncertainties in the satellite data. Therefore, caution is needed when discussing the results for  
235 this region, as neither regression method can reliably capture the large variability."

236

237

238 l. 340: "These differences between OLS- and ridge- based ozone profile trends imply that  
239 Ridge regression to some extent has improved the reliability of the model in the presence of  
240 multi-collinearity." This is not generally true as discussed above. Again: Differences between  
241 OLS and ridge-based trends are within the uncertainties of the individual trends.

242

243 Reply: We have modified this sentence as follows: "Despite these differences between OLS-  
244 and Ridge-based ozone profile trends, the even larger uncertainties e.g. in the lower  
245 stratosphere (Figure S3), indicate the ozone trends from two regression models are not  
246 different from each other." (Lines 382-384)

247

248 l. 346: "Considering the nonlinear effect, the monthly terms of QBO proxies are used for  
249 regression analyses" I do not understand what is meant to be said here. Statement can be  
250 omitted.

251

252 Reply: OK. We have omitted this statement to avoid misinterpretation.

253

254 l. 355: "corresponds to the more positive ozone trends in both simulations". To me it is not  
255 clear how long-term ozone trends can be associated with QBO (contains only periodic  
256 changes after detrending)

257 l. 358: "... may account for the more positive ozone trends", see previous comment

258

259 Reply: We apologize for the misleading statements. We have omitted these sentences in the  
260 revised manuscript.

261

262 l. 363: How is the anomaly defined (amplitude, i.e. max minus minimum response relative to  
263 the long term zonal mean ozone times the sign of the fit coefficient?). Please specify.

264

265 Reply: The ozone anomaly (in %) is calculated by referencing the monthly mean ozone to the  
266 climatological mean for each calendar month. As all the explanatory proxies in the regression  
267 models are normalised between 0 and 1, the contribution of the natural processes (QBO, solar,  
268 ENSO, AO, AAO and EP flux) to the percentage ozone changes can be directly denoted by  
269 the fit coefficients (also equivalent to the max minus minimum response relative to the  
270 long-term zonal mean ozone times the sign of the fit coefficient).

271

272 l. 388: ozone trends are only shown below 60degs, but solar response up to 90degs. Ozone is  
273 not well sampled above 50-60degs in the early period by SWOOSH. Is the solar response a

274 result from a fit solely limited to the late period after 1998? Why are ozone trends above  
275 60degs not shown?

276

277 Reply: The solar response (Fig. 8), as well as the response from other natural processes (Fig.  
278 10), is a result from a regression fit over the whole time period 1984-2020, not solely limited  
279 to the late period after 1998. To avoid the not-well-sampled data above 50-60° in the early  
280 period by SWOOSH, we have adjusted the latitude region in Figs 8 and 10 from 80°S-80°N to  
281 60°S-60°N, at the same time to have consistent latitude regions as shown in the ozone trend  
282 results (Figs 2-5).

283

284 l. 395: use only single digits (see earlier comments). Is the table needed as the numbers can be  
285 derived from Fig. 9?

286

287 Reply: We have checked throughout the main text and changed the numbers to one digit. As  
288 the table here is derived from Fig. 9, we removed it in the revised version.

289

290 l. 409: see comments to l. 388. Please add the results of the EP flux proxy (I guess it is the  
291 vertical component of the EP flux).

292

293 Reply: As replied earlier, we have added the results and discussion about the contribution  
294 from the EP flux proxy (the vertical component of the EP flux), as shown in the revised  
295 Figure 10 and Figure S7, and the main text (Lines 463-470)

296

297 l. 425: "The negative AO (AAO) indices in the extratropics ...". This is evident in the models  
298 and ML-TOMCAT above 60 degs but not in SWOOSH. Can this be explained? Are the  
299 regressions above 60degs problematic?

300

301 Reply: As replied earlier (l. 388), the AO/AAO response is derived from a regression fit over  
302 the whole time period 1984-2020. To avoid the not-well-sampled data above 60° by  
303 SWOOSH, we have adjusted the latitude region from 80°S-80°N to 60°S-60°N.

304

305 l. 444: "it is inappropriate to use the same regression model for all locations" Not clear what is  
306 meant here, you mean you cannot use a ridge regression with a constant tuning parameter or  
307 you mean OLS. As discussed earlier I do not think that the use of OLS is inappropriate.

308

309 Reply: What we want to say here is that for Ridge regression we cannot use a constant tuning  
310 parameter for all locations. We agree with the reviewer that the OLS regression will yield  
311 robust results when the atmospheric-dynamics-related proxies are orthogonalised (Weber et  
312 al., 2022), and the Ridge regression we use here is another representation with different  
313 constraints, but it is not necessarily better than OLS.

314

315 l. 456: "The largest difference between OLS and Ridge regression methods appears in the  
316 tropical lower stratosphere (with ~7 % per decade difference at 100 hPa).", but do not forget  
317 the trend uncertainties for both regression are very high (~23%/decade).



318

319 Reply: Yes. As replied earlier, we have revised this sentence and also checked throughout the  
320 paper to make relevant modifications. These modifications can be found in the revised  
321 manuscript (Lines 290-295, 506-508).

322

323 Technical (selected):

324 l. 37: change to "the SWOOSH dataset" Done.

325 l. 58: "controlled by transport and" (omit "the") Done.

326 l. 150: add Snow et al. 2014 (doi:10.1051/swsc/2014001) as reference for the MgII index

327 The reference has been added.

328 l. 183: I am not sure if "objective function" is the right term, suggest "cost function" instead.

329 Thanks. We have changed it to "cost function".

330 l. 194: "as described in Hastie" (add "as described in") Done.

331 l. 204: "the Python scikrit module" (add "the") Done.

332 l. 220: better: "where MSE is minimum" Done.

333 l. 226: "fit residuals", I guess you mean trends Yes. We have changed it to "trends".

334 l. 231: Reword: You probably mean less variability in the ridge model and lower absolute fit  
335 coefficients in the ridge regression. Please reword.

336 Yes. We have modified this sentence to "Compared with the trend profiles derived from OLS  
337 regression, the Ridge regression model has less variability and lower absolute fit  
338 coefficients." (Lines 256-258)

339 l. 233: "insignificant due to large uncertainties) up to 24-24%/decade" (replace "with" with  
340 "due to" and remove "up to")

341 Thanks. We have modified this sentence to "The largest ozone decreases appear in the  
342 tropical lower stratosphere (with about -30 % per decade for OLS and -12 % per decade for  
343 Ridge regression) although there are large uncertainties (>20 % per decade)." (Lines 259-260)

344 l. 233: "These large uncertainties" (remove "decreases and") Done.

345 l. 239: "We note" (remove "should") Done.

346 l. 249: change "compared between" to "derived from" Done.

347 l. 256: "across all three" (remove "the") Done.

348 l. 257: change "relatively" to "slightly" Done.

349 l. 262: change "in the NH" to "at NH" Done.

350 l. 280: "and ERA5 shows". remove "and" and start a new sentence here Done.

351 l. 281: remove "more overestimated" Done.

352 l. 289: change "monthly mean variations" to "seasonal variations" Done.

353 l. 302: change "... to some extent with smaller coefficients" to "absolute ridge-based trends  
354 and fit coefficients are smaller" Done.

355 l. 310: "based on the ridge regression" (add "the") Done.

356 l. 312: change "minimal" to "minimum" Done.

357 l. 363: "QBO response on ozone" (add "response") Done.

358 l. 373: change "there is a minimal solar cycle signal (negative and statistically significant) at  
359 ~10 hPa" to "there is a negative and statistically significant solar cycle response at ~10 hPa"

360 Thanks. As we have updated the results for OLS regression, we have changed this sentence  
361 and added more information in the revised manuscript (Lines 410-439).

362 l. 403: "being about twice larger" (add "being") Done.  
363 l. 468: change "The negative AO/AAO coefficients" to "The negative phase of AO/AAO"  
364 Done.

365

366 *PS: Some references are added according to the updated content in the revised manuscript.*

367

368 **References:**

369 *Abalos, M., Randel, W. J., Kinnison, D. E., and Garcia, R. R.: Using the Artificial Tracer e90*  
370 *to Examine Present and Future UTLS Tracer Transport in WACCM, J Atmos Sci, 74,*  
371 *3383-3403, <https://doi.org/10.1175/JAS-D-17-0135.1>, 2017.*

372 *Banerjee, A., Maycock, A. C., Archibald, A. T., Abraham, N. L., Telford, P., Braesicke, P.,*  
373 *and Pyle, J. A.: Drivers of changes in stratospheric and tropospheric ozone between year*  
374 *2000 and 2100, Atmos. Chem. Phys., 16, 2727 – 2746,*  
375 *<https://doi.org/10.5194/acp-16-2727-2016>, 2016.*

376 *Chiodo, G., Marsh, D. R., Garcia-Herrera, R., Calvo, N., and García, J. A.: On the detection*  
377 *of the solar signal in the tropical stratosphere, Atmos. Chem. Phys., 14, 5251 – 5269,*  
378 *<https://doi.org/10.5194/acp-14-5251-2014>, 2014.*

379 *Dhomse, S. S., Chipperfield, M. P., Feng, W., Hossaini, R., Mann, G. W., Santee, M. L., and*  
380 *Weber, M.: A single-peak-structured solar cycle signal in stratospheric ozone based on*  
381 *Microwave Limb Sounder observations and model simulations, Atmos. Chem. Phys., 22,*  
382 *903 – 916, <https://doi.org/10.5194/acp-22-903-2022>, 2022.*

383 *Fusco, A. C., and M. L. Salby, Interannual variations of total ozone and their relationship to*  
384 *variations of planetary wave activity, J. Clim., 12, 1619 – 1629,*  
385 *[https://doi.org/10.1175/1520-0442\(1999\)012<1619:IVOTOA>2.0.CO;2](https://doi.org/10.1175/1520-0442(1999)012<1619:IVOTOA>2.0.CO;2), 1999.*

386 *Randel, W. J., Wu, F., and Stolarski, R. S.: Changes in column ozone correlated with the*  
387 *stratospheric EP flux, J. Meteorol. Soc. Japan, 80, 849 – 862,*  
388 *<https://doi.org/10.2151/jmsj.80.849>, 2002.*

389 *Snow, M., Weber, M., Machol, J., Viereck, R., and Richard, E.: Comparison of Magnesium II*  
390 *core-to-wing ratio observations during solar minimum 23/24, J. Space Weather Space*  
391 *Clim., 4, A04, <https://doi.org/10.1051/swsc/2014001>, 2014.*

392 *Smith, A. and Matthes, K.: Decadal-scale periodicities in the stratosphere associated with the*  
393 *solar cycle and the QBO, J. Geophys. Res., 113, D05311,*  
394 *<https://doi.org/10.1029/2007JD009051>, 2008.*

395 *Weber, M., Dhomse, S., Wittrock, F., Richter, A., Sinnhuber, B. M., and Burrows, J. P.:*  
396 *Dynamical control of NH and SH winter/spring total ozone from GOME observations in*  
397 *1995-2002, Geophysical Research Letters, 30, 10.1029/2002gl016799, 2003.*

398 *Weber, M., Arosio, C., Coldewey-Egbers, M., Fioletov, V. E., Frith, S. M., Wild, J. D.,*  
399 *Tourpali, K., Burrows, J. P., and Loyola, D.: Global total ozone recovery trends attributed*  
400 *to ozone-depleting substance (ODS) changes derived from five merged ozone datasets,*  
401 *Atmos. Chem. Phys., 22, 6843 – 6859, <https://doi.org/10.5194/acp-22-6843-2022>, 2022.*

402 **Reply to the supplementary comment from Mark Weber:**

403 There was one point I missed in my review. For trends from monthly mean ozone time series  
404 a correction is applied in the regression to account for autoregression (AR1). This correction  
405 does not change trends so much but increases the uncertainties due to the reduction of  
406 degree-of-freedom associated with AR. It can be applied to both OLS and Ridge regression  
407 and should be done. If not, at least a good reason should be given why it is not needed here.

408

409 Reply: We thank the reviewer for his comments and suggestions about applying a correction  
410 in the regression to account for the autoregression (AR1) for the trends from monthly mean  
411 ozone time series.

412

413 We have updated our results by including a lag-1 autocorrelation correction process in the  
414 OLS regression model with the Cochrane-Orcutt method (1949). The Cochrane-Orcutt  
415 method is a popular approach used to correct for first-order autocorrelation (AR1) in the  
416 residuals of a regression model with ordinary least squares (OLS) method (e.g. Dhomse et al.,  
417 2006; Ball et al., 2019; Petropavlovskikh et al., 2019; Bognar et al., 2022; Godin-Beekmann  
418 et al., 2022). The procedure is performed iteratively with the covariance matrix updated for  
419 each iteration until the autocorrelation coefficient has converged sufficiently  
420 (Cochrane-Orcutt, 1949; Prais and Winsten, 1954).

421

422 As mentioned by the reviewer, the trend coefficients do not change much but the uncertainties  
423 increase to some extent with this correction. It should be noted that the residuals in some  
424 region of the tropical mid-lower stratosphere are still large and auto-correlated after the AR1  
425 correction with the Cochrane-Orcutt method. Hence, some limitations and assumptions of the  
426 Cochrane-Orcutt method should be noted, e.g.:

427 (1) Limited to AR1 Autocorrelation: The Cochrane-Orcutt method is specifically  
428 designed to handle first-order autocorrelation (AR1). If the autocorrelation in the residuals  
429 follows a higher-order AR process or a different pattern, this method may not be appropriate  
430 or effective.

431 (2) Relying on AR1 Parameter Estimation: Estimating the AR1 parameter involves  
432 making assumptions about the structure of autocorrelation and may not be reliable, especially  
433 with small sample sizes or noisy data.

434 (3) Parameter Interpretation: After applying the Cochrane-Orcutt correction, the  
435 estimated regression coefficients and their interpretation can be affected. The coefficients of  
436 the corrected model may not have a direct interpretation in the same way as those from the  
437 original model.

438 (4) Efficiency Loss: Correcting for autocorrelation may lead to a loss of statistical  
439 efficiency in parameter estimates, potentially resulting in wider confidence intervals and  
440 reduced power to detect significant effects.

441 (5) Diagnostics: Assessing the adequacy of the correction and the presence of any  
442 remaining autocorrelation may be challenging. Model diagnostics become essential to ensure  
443 the correction's appropriateness and to identify any model misspecification issues.

444 (6) Data Transformation: The method involves transforming the data and iteratively

445 estimating parameters, which may lead to additional complexities and computational burden,  
446 especially for large datasets.

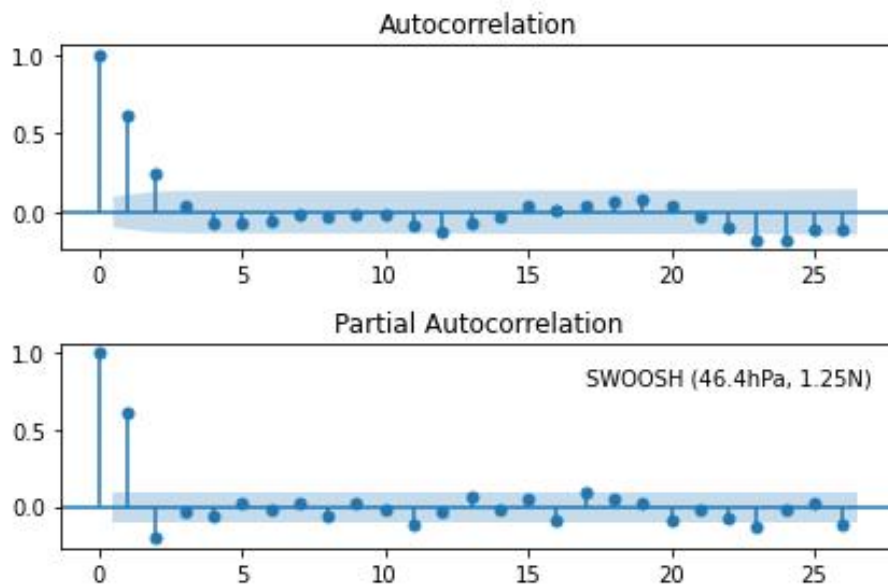

447

448 **Figure RC1:** Estimates of a higher-order AR structure (AR2) of the residuals using  
449 autocorrelation and partial autocorrelation based on SWOOSH dataset.

450 Figure RC1 shows a case of the AR2 structure estimated by the autocorrelation and partial  
451 autocorrelation function of the residuals. Despite the limitations of the Cochrane-Orcutt  
452 method, the method of the usual least squares can still yield the best linear unbiased estimates  
453 of the regression coefficients provided the autocorrelated error terms are taken into account  
454 (Cochrane-Orcutt, 1949).

455 In the Ridge regression, an additional constraint (an L2 penalty) in the cost function is  
456 introduced to constrain the magnitudes and fluctuations of the coefficient estimates. This  
457 constraint helps to reduce the variance of the model at the expense of no longer being  
458 unbiased. For our current MLR setup, we choose not to apply the AR1 correction to Ridge  
459 regression. If we still apply the AR1 correction to Ridge regression as for the OLS regression,  
460 the estimated regression coefficients can be affected as the correlation between the regression  
461 model and underlying data becomes very poor after "correction", and the regression in this  
462 case is in an "under-fitting" state with a very large tuning parameter. Besides, when applying  
463 the AR1 correction to Ridge regression, the autocorrelation coefficient does not always  
464 converge during iteration which makes it impossible to obtain the covariance matrix as in  
465 OLS regression. Hence, care is needed when applying the AR1 correction to Ridge regression  
466 and more detailed work can be carried out in future studies.

467 We have added a paragraph in the revised manuscript to clarify the differences using OLS and  
468 Ridge regression models (Lines 231-245). In Figures RC2-3, the updated ozone trend profiles  
469 with AR1 correction applied to the OLS regression are shown and compared with Ridge  
470 regression results (with no AR1 correction). Please also see Figures 2-3 in the revised  
471 manuscript.

472 We also updated the other figures with corrected OLS regression and more detailed

473 modifications of the updated results are marked in red in the revised manuscript. The related  
474 code and data files are uploaded on github ([https://github.com/AmyLee07/  
475 Data-and-code-for-OLS-and-Ridge-regression.git](https://github.com/AmyLee07/Data-and-code-for-OLS-and-Ridge-regression.git)).  
476

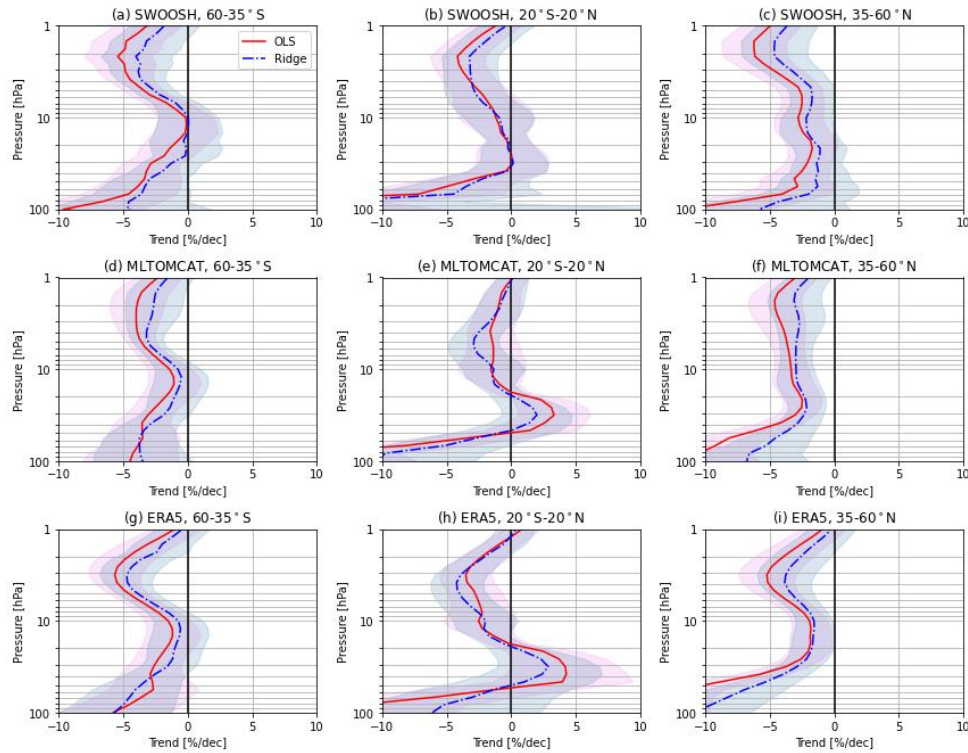

477  
478 **Figure RC2:** Profiles of annual mean stratospheric ozone trends (% per decade) compared  
479 between OLS and Ridge regression methods for three latitude bands (60-35°S, 20°S-20°N and  
480 35-60°N) from (a-c) SWOOSH, (d-f) ML-TOMCAT, and (g-i) ERA5 model simulation over  
481 the period 1984-1997. Shaded regions are 2- $\sigma$  uncertainties. (Data during 1991-1994 are  
482 removed).

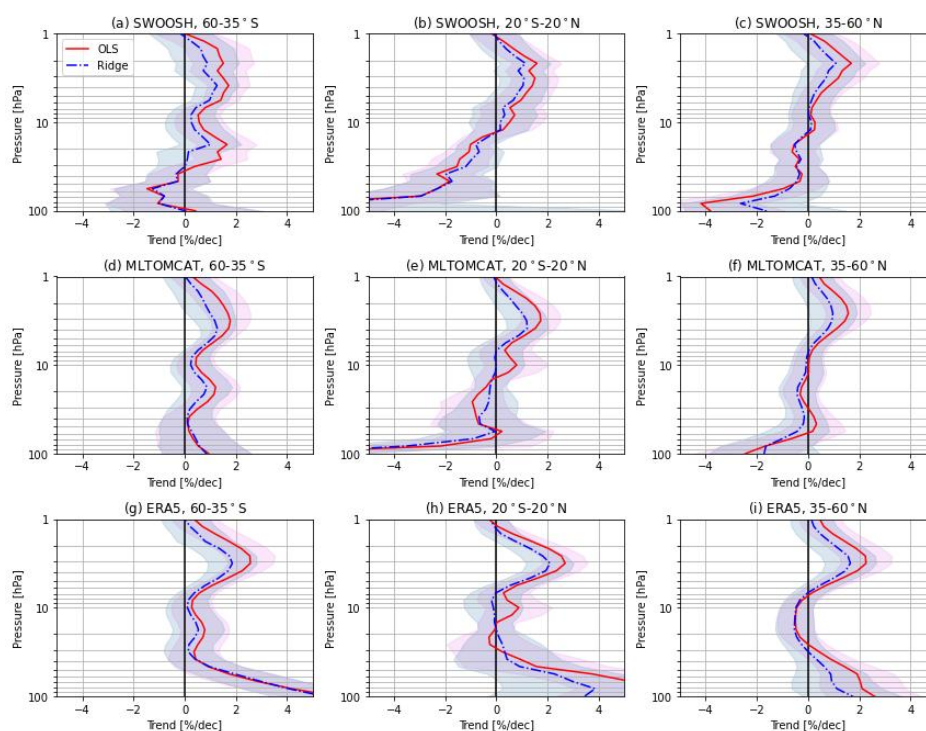

483

484 **Figure RC3:** Same as Figure RC2 but for the post-1998 time periods (1998-2020) for  
 485 SWOOSH, ML-TOMCAT and ERA5 model simulation.

486

487

488 **References:**

489 *Ball, W. T., Alsing, J., Staehelin, J., Davis, S. M., Froidevaux, L., and Peter, T.: Stratospheric*  
 490 *ozone trends for 1985 – 2018: sensitivity to recent large variability, Atmos. Chem. Phys.,*  
 491 *19, 12731 – 12748, <https://doi.org/10.5194/acp-19-12731-2019>, 2019*

492 *Bognar, K., Tegtmeier, S., Bourassa, A., Roth, C., Warnock, T., Zawada, D., and Degenstein,*  
 493 *D.: Stratospheric ozone trends for 1984 – 2021 in the SAGE II – OSIRIS – SAGE III/ISS*  
 494 *composite dataset, Atmos. Chem. Phys., 22, 9553 – 9569,*  
 495 *<https://doi.org/10.5194/acp-22-9553-2022>, 2022.*

496 *Cochrane, D. and Orcutt, G. H.: Application of least squares regression to relationships*  
 497 *containing auto-correlated error terms, J. Am. Stat. Assoc., 44, 32–61,*  
 498 *<https://doi.org/10.2307/2280349>, 1949.*

499 *Dhomse, S., Weber, M., Wohltmann, I., Rex, M., and Burrows, J. P.: On the possible causes of*  
 500 *recent increases in northern hemispheric total ozone from a statistical analysis of satellite*  
 501 *data from 1979 to 2003, Atmospheric Chemistry and Physics, 6, 1165-1180,*  
 502 *<https://doi.org/10.5194/acp-6-1165-2006>, 2006.*

503 *Godin-Beekmann, S., Azouz, N., Sofieva, V. F., Hubert, D., Petropavlovskikh, I., Effertz, P.,*  
 504 *Ancellet, G., Degenstein, D. A., Zawada, D., Froidevaux, L., Frith, S., Wild, J., Davis, S.,*  
 505 *Steinbrecht, W., Leblanc, T., Querel, R., Tourpali, K., Damadeo, R., MaillardBarras, E.,*  
 506 *Stübi, R., Vigouroux, C., Arosio, C., Nedoluha, G., Boyd, I., Van Malderen, R., Mahieu, E.,*  
 507 *Smale, D., and Sussmann, R.: Updated trends of the stratospheric ozone vertical*  
 508 *distribution in the 60° S – 60° N latitude range based on the LOTUS regression model ,*

509 *Atmos. Chem. Phys.*, 22, 11657 – 11673, <https://doi.org/10.5194/acp-22-11657-2022>,  
510 2022.  
511 Prais, S. J. and Winsten, C. B.: Trend estimators and serial correlation, Cowles Commission  
512 discussion paper: Statistics no. 383, 1–26, 1954.  
513 Petropavlovskikh, I., Godin-Beekmann, S., Hubert, D., Damadeo, R., Hassler, B., and Sofieva,  
514 V.: SPARC/IO3C/GAW Report on Long-term Ozone Trends and Uncertainties in the  
515 Stratosphere, Tech. rep., SPARC, 9th assessment report of the SPARC project,  
516 International Project Office at DLR-IPA, GAW Report No. 241, WCRP Report 17/2018,  
517 available at: <https://elib.dlr.de/126666/>, 2019.  
518
