# Supplementary material for: Stratospheric ozone trends and attribution over 1984–2020 using ordinary and regularised multivariate regression models
Source: Copernicus journal article supplement (doi:10.5194/egusphere-2023-591), 2023-04-14
Supplement: Supplementary file [file egusphere-2023-591-AC2-supplement.pdf]

1 **Reply to the supplementary comment from Mark Weber:**

2 There was one point I missed in my review. For trends from monthly mean ozone time series  
3 a correction is applied in the regression to account for autoregression (AR1). This correction  
4 does not change trends so much but increases the uncertainties due to the reduction of  
5 degree-of-freedom associated with AR. It can be applied to both OLS and Ridge regression  
6 and should be done. If not, at least a good reason should be given why it is not needed here.

7  
8 Reply: We thank the reviewer for his comments and suggestions about applying a correction  
9 in the regression to account for the autoregression (AR1) for the trends from monthly mean  
10 ozone time series.

11  
12 We have updated our results by including a lag-1 autocorrelation correction process in the  
13 OLS regression model with the Cochrane-Orcutt method (1949). The Cochrane-Orcutt  
14 method is a popular approach used to correct for first-order autocorrelation (AR1) in the  
15 residuals of a regression model with ordinary least squares (OLS) method (e.g. Dhomse et al.,  
16 2006; Ball et al., 2019; Petropavlovskikh et al., 2019; Bognar et al., 2022; Godin-Beekmann  
17 et al., 2022). The procedure is performed iteratively with the covariance matrix updated for  
18 each iteration until the autocorrelation coefficient has converged sufficiently  
19 (Cochrane-Orcutt, 1949; Prais and Winsten, 1954).

20  
21 As mentioned by the reviewer, the trend coefficients do not change much but the uncertainties  
22 increase to some extent with this correction. It should be noted that the residuals in some  
23 region of the tropical mid-lower stratosphere are still large and auto-correlated after the AR1  
24 correction with the Cochrane-Orcutt method. Hence, some limitations and assumptions of the  
25 Cochrane-Orcutt method should be noted, e.g.:

26 (1) Limited to AR1 Autocorrelation: The Cochrane-Orcutt method is specifically  
27 designed to handle first-order autocorrelation (AR1). If the autocorrelation in the residuals  
28 follows a higher-order AR process or a different pattern, this method may not be appropriate  
29 or effective.

30 (2) Relying on AR1 Parameter Estimation: Estimating the AR1 parameter involves  
31 making assumptions about the structure of autocorrelation and may not be reliable, especially  
32 with small sample sizes or noisy data.

33 (3) Parameter Interpretation: After applying the Cochrane-Orcutt correction, the  
34 estimated regression coefficients and their interpretation can be affected. The coefficients of  
35 the corrected model may not have a direct interpretation in the same way as those from the  
36 original model.

37 (4) Efficiency Loss: Correcting for autocorrelation may lead to a loss of statistical  
38 efficiency in parameter estimates, potentially resulting in wider confidence intervals and  
39 reduced power to detect significant effects.

40 (5) Diagnostics: Assessing the adequacy of the correction and the presence of any  
41 remaining autocorrelation may be challenging. Model diagnostics become essential to ensure  
42 the correction's appropriateness and to identify any model misspecification issues.

43 (6) Data Transformation: The method involves transforming the data and iteratively  
44 estimating parameters, which may lead to additional complexities and computational burden,

45 especially for large datasets.

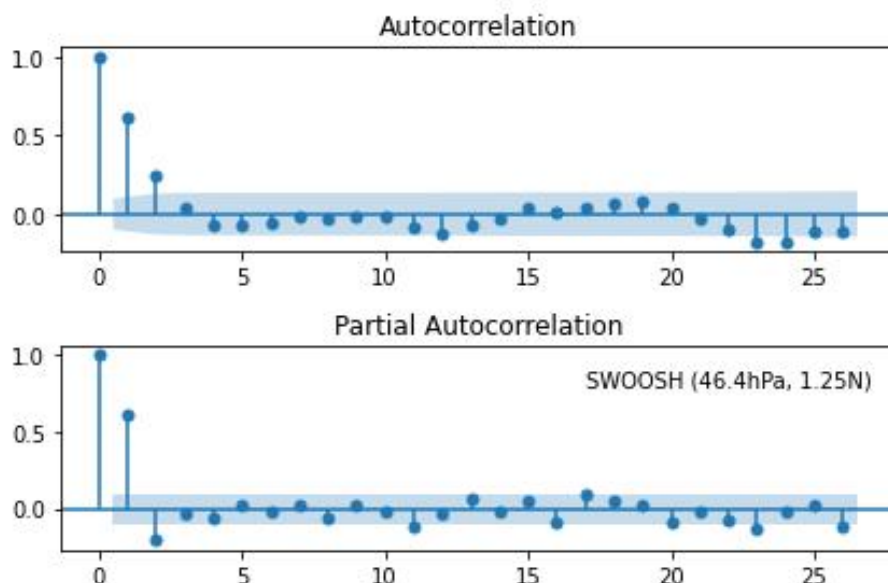

46

47 **Figure RC1:** Estimates of a higher-order AR structure (AR2) of the residuals using  
48 autocorrelation and partial autocorrelation based on SWOOSH dataset.

49 Figure RC1 shows a case of the AR2 structure estimated by the autocorrelation and partial  
50 autocorrelation function of the residuals. Despite the limitations of the Cochrane-Orcutt  
51 method, the method of the usual least squares can still yield the best linear unbiased estimates  
52 of the regression coefficients provided the autocorrelated error terms are taken into account  
53 (Cochrane-Orcutt, 1949).

54 In the Ridge regression, an additional constraint (an L2 penalty) in the cost function is  
55 introduced to constrain the magnitudes and fluctuations of the coefficient estimates. This  
56 constraint helps to reduce the variance of the model at the expense of no longer being  
57 unbiased. For our current MLR setup, we choose not to apply the AR1 correction to Ridge  
58 regression. If we still apply the AR1 correction to Ridge regression as for the OLS regression,  
59 the estimated regression coefficients can be affected as the correlation between the regression  
60 model and underlying data becomes very poor after "correction", and the regression in this  
61 case is in an "under-fitting" state with a very large tuning parameter. Besides, when applying  
62 the AR1 correction to Ridge regression, the autocorrelation coefficient does not always  
63 converge during iteration which makes it impossible to obtain the covariance matrix as in  
64 OLS regression. Hence, care is needed when applying the AR1 correction to Ridge regression  
65 and more detailed work can be carried out in future studies.

66 We have added a paragraph in the revised manuscript to clarify the differences using OLS and  
67 Ridge regression models (Lines 231-245). In Figures RC2-3, the updated ozone trend profiles  
68 with AR1 correction applied to the OLS regression are shown and compared with Ridge  
69 regression results (with no AR1 correction). Please also see Figures 2-3 in the revised  
70 manuscript.

71 We also updated the other figures with corrected OLS regression and more detailed  
72 modifications of the updated results are marked in red in the revised manuscript. The related

73 code and data files are uploaded on github ([https://github.com/AmyLee07/](https://github.com/AmyLee07/Data-and-code-for-OLS-and-Ridge-regression.git)  
74 [Data-and-code-for-OLS-and-Ridge-regression.git](https://github.com/AmyLee07/Data-and-code-for-OLS-and-Ridge-regression.git)).  
75

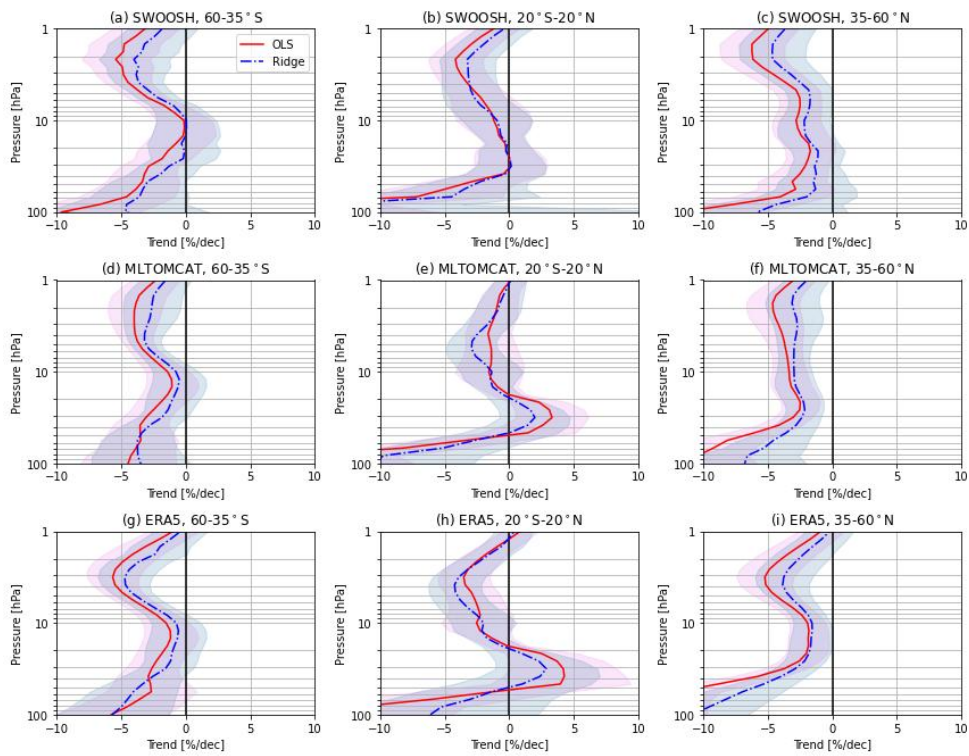

76  
77 **Figure RC2:** Profiles of annual mean stratospheric ozone trends (% per decade) compared  
78 between OLS and Ridge regression methods for three latitude bands (60-35°S, 20°S-20°N and  
79 35-60°N) from (a-c) SWOOSH, (d-f) ML-TOMCAT, and (g-i) ERA5 model simulation over  
80 the period 1984-1997. Shaded regions are 2- $\sigma$  uncertainties. (Data during 1991-1994 are  
81 removed).

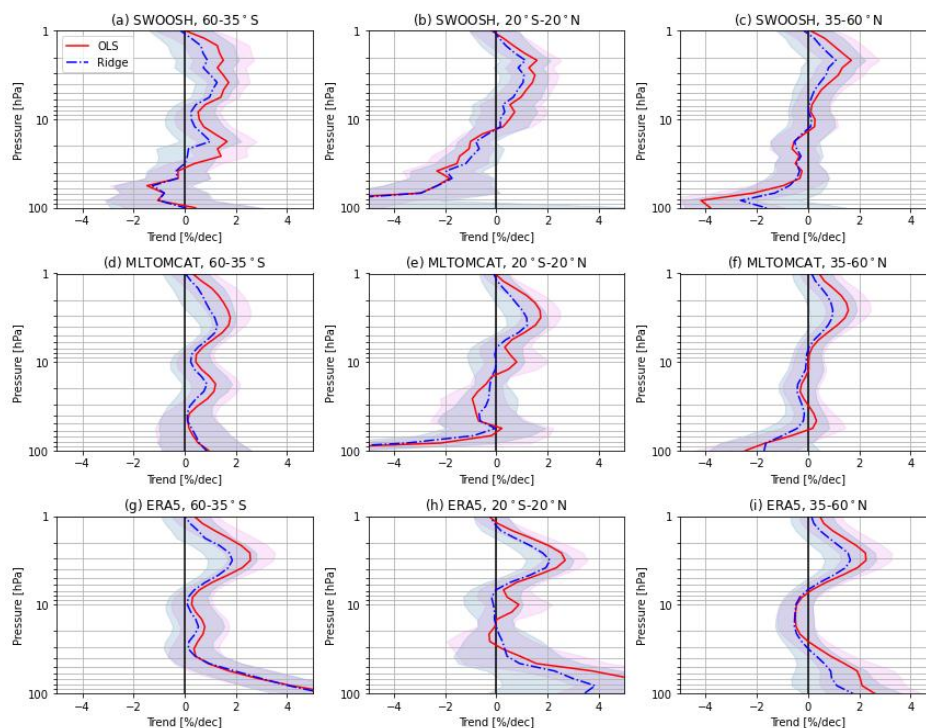

82  
83 **Figure RC3:** Same as Figure RC2 but for the post-1998 time periods (1998-2020) for  
84 SWOOSH, ML-TOMCAT and ERA5 model simulation.

85  
86  
87 **References:**

88 *Ball, W. T., Alsing, J., Staehelin, J., Davis, S. M., Froidevaux, L., and Peter, T.: Stratospheric*  
89 *ozone trends for 1985 – 2018: sensitivity to recent large variability, Atmos. Chem. Phys.,*  
90 *19, 12731 – 12748, <https://doi.org/10.5194/acp-19-12731-2019>, 2019*

91 *Bognar, K., Tegtmeier, S., Bourassa, A., Roth, C., Warnock, T., Zawada, D., and Degenstein,*  
92 *D.: Stratospheric ozone trends for 1984 – 2021 in the SAGE II – OSIRIS – SAGE III/ISS*  
93 *composite dataset, Atmos. Chem. Phys., 22, 9553 – 9569,*  
94 *<https://doi.org/10.5194/acp-22-9553-2022>, 2022.*

95 *Cochrane, D. and Orcutt, G. H.: Application of least squares regression to relationships*  
96 *containing auto-correlated error terms, J. Am. Stat. Assoc., 44, 32–61,*  
97 *<https://doi.org/10.2307/2280349>, 1949.*

98 *Dhomse, S., Weber, M., Wohltmann, I., Rex, M., and Burrows, J. P.: On the possible causes of*  
99 *recent increases in northern hemispheric total ozone from a statistical analysis of satellite*  
100 *data from 1979 to 2003, Atmospheric Chemistry and Physics, 6, 1165-1180,*  
101 *<https://doi.org/10.5194/acp-6-1165-2006>, 2006.*

102 *Godin-Beekmann, S., Azouz, N., Sofieva, V. F., Hubert, D., Petropavlovskikh, I., Effertz, P.,*  
103 *Ancellet, G., Degenstein, D. A., Zawada, D., Froidevaux, L., Frith, S., Wild, J., Davis, S.,*  
104 *Steinbrecht, W., Leblanc, T., Querel, R., Tourpali, K., Damadeo, R., MaillardBarras, E.,*  
105 *Stübi, R., Vigouroux, C., Arosio, C., Nedoluha, G., Boyd, I., Van Malderen, R., Mahieu, E.,*  
106 *Smale, D., and Sussmann, R.: Updated trends of the stratospheric ozone vertical*  
107 *distribution in the 60° S – 60° N latitude range based on the LOTUS regression model ,*

108 *Atmos. Chem. Phys.*, 22, 11657 – 11673, <https://doi.org/10.5194/acp-22-11657-2022>,  
109 2022.  
110 Prais, S. J. and Winsten, C. B.: Trend estimators and serial correlation, Cowles Commission  
111 discussion paper: Statistics no. 383, 1–26, 1954.  
112 Petropavlovskikh, I., Godin-Beekmann, S., Hubert, D., Damadeo, R., Hassler, B., and Sofieva,  
113 V.: SPARC/IO3C/GAW Report on Long-term Ozone Trends and Uncertainties in the  
114 Stratosphere, Tech. rep., SPARC, 9th assessment report of the SPARC project,  
115 International Project Office at DLR-IPA, GAW Report No. 241, WCRP Report 17/2018,  
116 available at: <https://elib.dlr.de/126666/>, 2019.  
117
